# Supplementary material for: Mirror image molecules expose state of rainforest stress
Source: Research Square preprint supplement (doi:10.21203/rs.3.rs-6394095/v1), 2025-06-03
Supplement: Supplementary file 1 [file 025dcdf85e65e50aa0a53722.docx]

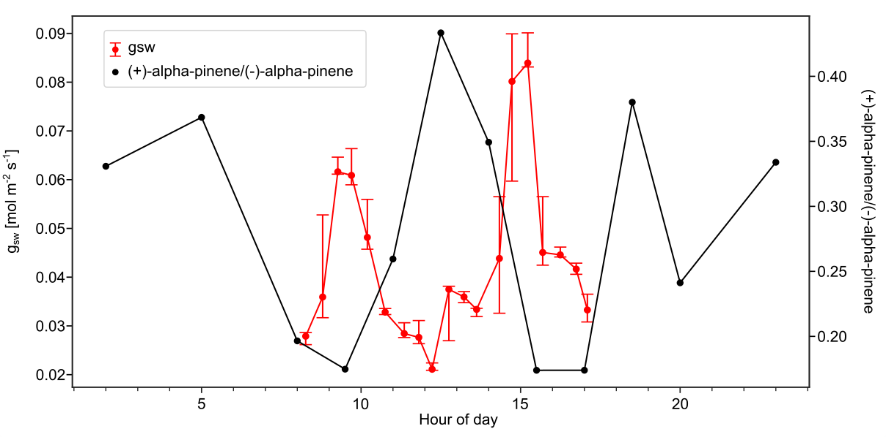


**Extended Data Fig. 1 |Stomatal conductance generally peaked in the morning and afternoon during September 2023 reflecting the pattern seen for the ratio of (+)-alpha-pinene to (-)-alpha-pinene in October 2023.** Combined stomatal conductance data for one leaf from 12 plant species around the 80 m walk-up tower measured at different times of day over 5 days from 15th September to 19th September 2023. The data was first smoothed with a moving median function and then averaged to every 30 minutes, the whiskers represent the 25th and 75th percentiles, see methods section for more detail. The (+)-alpha-pinene to (-)-alpha-pinene ratio data is the same as that showed in Fig. 2 and is the median of (+)-alpha-pinene to (-)-alpha-pinene mixing ratio for each measurement time.


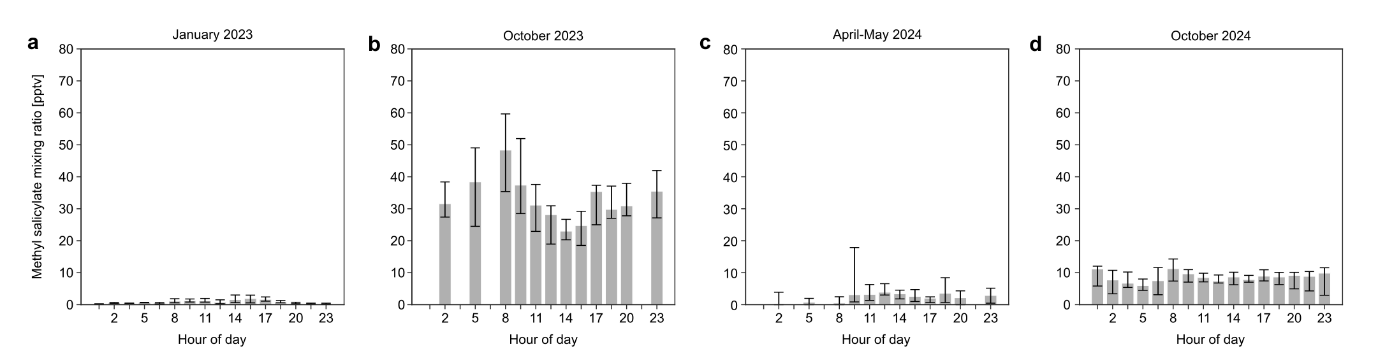


**Extended Data Fig. 2 | Extreme abiotic stress during October 2023 causes increases in abundance of methyl salicylate.** Diurnal cycles for each measurement period showing median mixing ratios for MeSA and the whiskers represent the 25th and 75th percentiles. **e**. January 2023. **f**. October 2023. **g**. April-May 2024. **h**. October 2024.

**Extended Data Table 1.** List of species from which stomatal conductance was measured and their leaf phenological types: BD = brevideciduous; EV = evergreen.

| ID | Species | Leaf phenological type |
| --- | --- | --- |
| **27** | *Manilkara bidentata* | BD |
| **37** | *Cariniana decandra* | BD |
| **140** | *Pouteria guianensis* | BD |
| **28** | *Dinizia excelsa* | EV |
| **70** | *Scleronema micranthum* | EV |
| **227** | *Croton matourensis* | EV |
| **80** | *Endopleura uchi* | BD |
| **96** | *Peltogyne catingae* | BD |
| **189** | *Brosimum parinarioides* | BD |
| **135** | *Eschweilera cyathiformis* | EV |
| **160** | *Protium spruceanum* | EV |
| **161** | *Minquartia guianensis* | EV |
